# Supplementary material for: Five Post-Translational Modification Residues of CmPT2 Play Key Roles in Yeast and Rice
Source: MDPI journal article supplement (doi:10.3390/ijms24032025), 2023-01-19
Supplement: s1 [file s1]

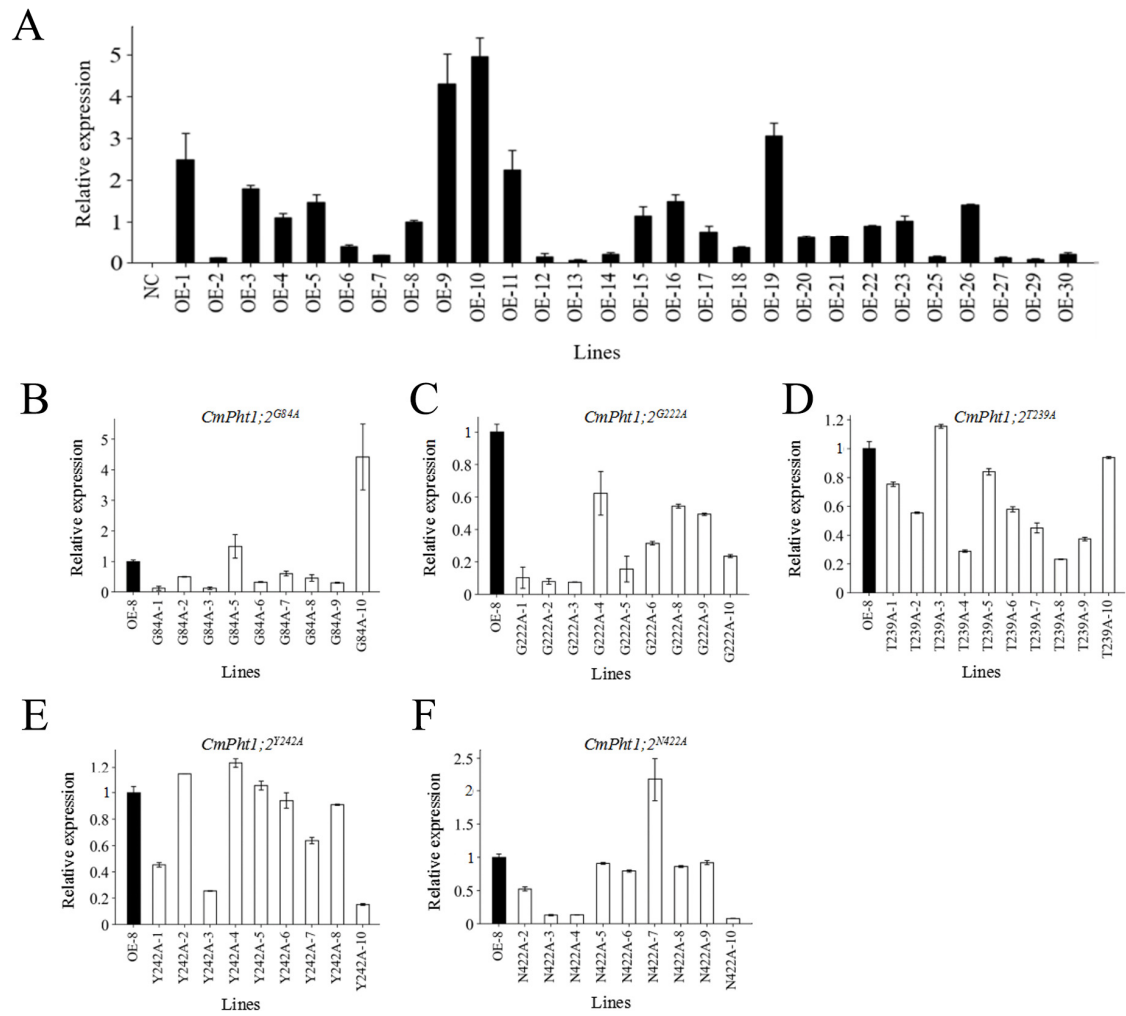

Supplementary Figure S1. Relative expression analysis of CmPT2 between W7 and CmPT2-OE lines (A), G84A-OE lines (B), G222A-OE lines (C), T239A-OE lines (D), Y242A-OE lines (E), N422A-OE lines (F).

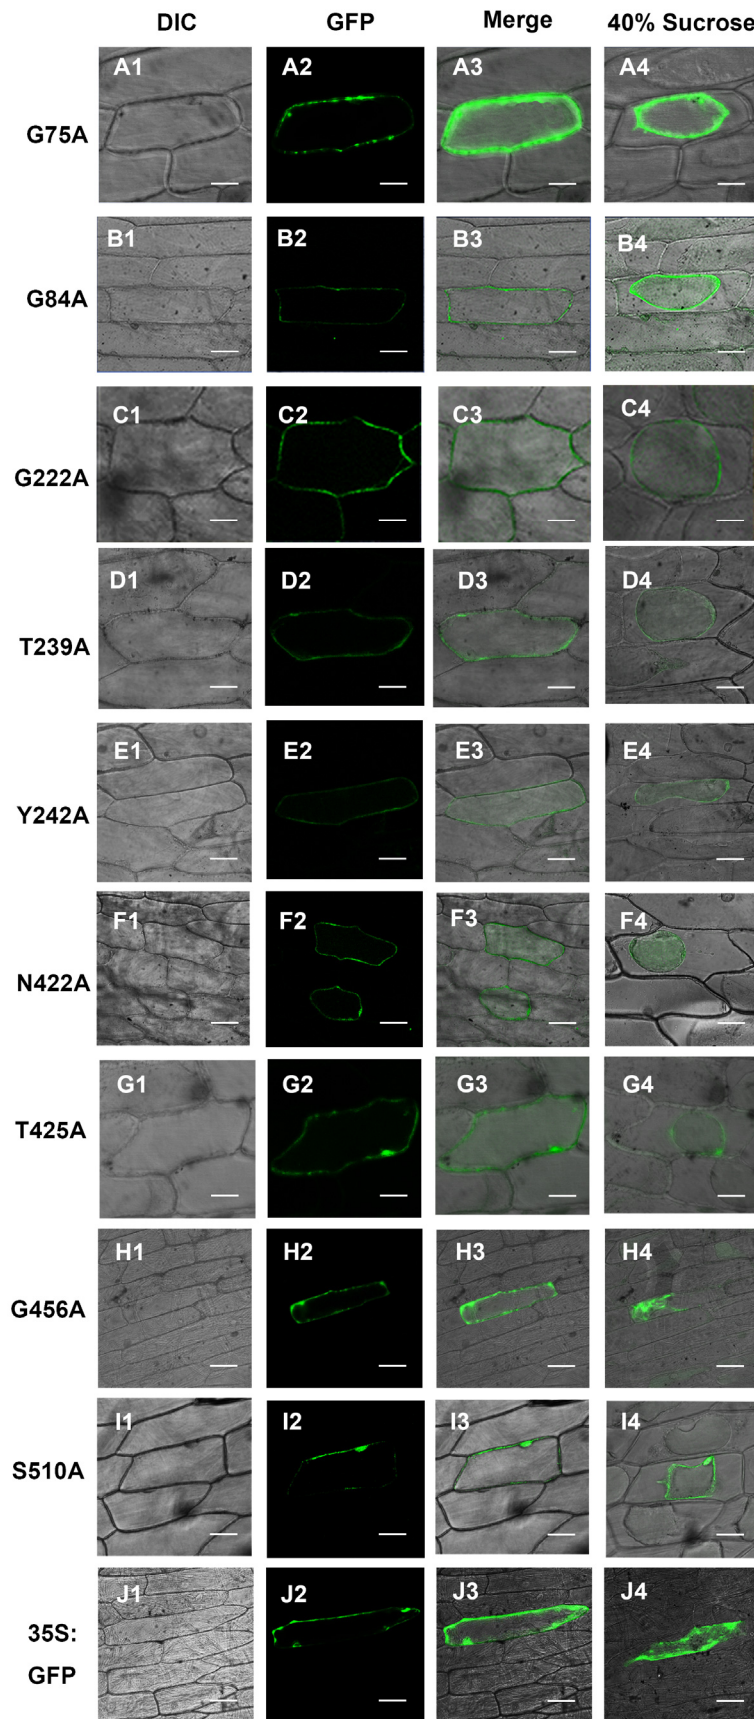

Supplementary Figure S2. Subcellular localization of Cmphts. A1-I1: cytoarchitecture; A2-I2: fluorescence signal; A3-I3: overlay plots; A4-I4: plasmolysis (40% Sucrose), Bar: 50  $\mu$ m.
