# Supplementary material for: Five Post-Translational Modification Residues of CmPT2 Play Key Roles in Yeast and Rice
Source: MDPI journal article supplement (doi:10.3390/ijms24032025), 2023-01-19
Supplement: s1 [file s1]

Archive with 4 entries (4 files):
- supplementary figures.pdf
- Supplementary Table S1.xlsx
- Supplementary Table S2.xlsx
- Supplementary Table S3.xlsx
