# Supplementary material for: Five Post-Translational Modification Residues of CmPT2 Play Key Roles in Yeast and Rice
Source: MDPI journal article supplement (doi:10.3390/ijms24032025), 2023-01-19
Supplement: s1 [file s1 › Supplementary Table S1.xlsx]

## Sheet: Sheet1
Supplemental Table S1 Primer sequences.
Primer name	5′–3′ sequence	Usage
112-EcoR I-F	CCGGAATTCATGGCTCGAGAACAACTACAAGTGC	p112A1NE vector
112-Not I-R	ATAAGAATGCGGCCGCTAAACTATTCAAGCAGGAGCAGTT	p112A2NE vector
G75AF	TAATTCTTCGGTTGTTGCTGTCGCCCTTGTTGGA	mutation G75A
G75AR	TCCAACAAGGGCGACAGCAACAACCGAAGAATTA	mutation G75A
G84AF	CTTGTTGGAACTTTATGTGCTCAACTTTTCTTCGGGTGG	mutation G84A
G84AR	CCACCCGAAGAAAAGTTGAGCACATAAAGTTCCAACAAG	mutation G84A
G222AF	GTATTATACTCATGTTTGCTGCCATCCCTGCAGC	mutation G222A
G222AR	GCTGCAGGGATGGCAGCAAACATGAGTATAATAC	mutation G222A
T239AF	GGCGTATGAAGATGCCAGAAGCTGCGCGTTAC	mutation T239A
T239AR	GTAACGCGCAGCTTCTGGCATCTTCATACGCC	mutation T239A
Y242AF	CAGAAACTGCGCGTGCCACTGCTTTGGTTGC	mutation Y242A
Y242AR	GCAACCAAAGCAGTGGCACGCGCAGTTTCTG	mutation Y242A
N422AF	TTTCTTCGCCAATTTCGGCCCTGCTGCCACAACTTTTGTTG	mutation N422A
N422AR	CAACAAAAGTTGTGGCAGCAGGGCCGAAATTGGCGAAGAAA	mutation N422A
T425AF	CGGCCCTAATGCCACAGCTTTTGTTGTTCCGGC	mutation G425A
T425AR	GCCGGAACAACAAAAGCTGTGGCATTAGGGCCG	mutation G425A
G456AF	GGCGCCATTGTCGCTGCCTACGGGTTT	mutation G456A
G456AR	AAACCCGTAGGCAGCGACAATGGCGCC	mutation G456A
S510AF	CAGAACCTAATGGTCGAGCACTCGAAGAGATGTCG	mutation S510A
S510AR	CGACATCTCTTCGAGTGCTCGACCATTAGGTTCTG	mutation S510A
CmPht1;2-CE-F	gtgttacttctgcagggatccATGGCTCGAGAACAACTACAAGTG	pCAMBIA1300 vector
CmPht1;2-CE-R	gctcaccataggcctcacgtgAGCAGGAGCAGTTCCGTTGTA	pCAMBIA1301 vector
CmPht1;2-1100-F	TCGTTTTGCAATCCAACTCA	PCR identification
GFP-R	GCTGAACTTGTGGCCGTTTA	PCR identification
CmPht1;2-RT-F	CGGAATCAGGTACTCGCTCA	qRT-PCR identification
CmPht1;2-RT-R	GTCCAGTAGGCTCCATTTCCT	qRT-PCR identification
ACTIN-RT-F	TCTAATTCTTCGGACCCAAGAATG	qRT-PCR
ACTIN-RT-R	AGCAGGAGGACGGCGATAA	qRT-PCR
OsSPX2-F (LOC_Os02g10780)	TCACCACCGACCTCCTCTAC	qRT-PCR
OsSPX2-R (LOC_Os02g10780)	GGCTTTGAACCCTTCTCCTC	qRT-PCR
OsIPS1-F (LOC_Os03g05334)	AAGGGCAGGGCACACTCCACATTATC	qRT-PCR
OsIPS1-R (LOC_Os03g05334)	ATTAGAGCAAGGACCGAAACACAAAC	qRT-PCR
OsPT2-F (LOC_Os03g05640)	GCACAAACTTCCTCGGTATGCTCA	qRT-PCR
OsPT2-R (LOC_Os03g05640)	ACTCACGTCGAGACGGCATGTTTA	qRT-PCR
OsPT3-F (LOC_Os10g30770)	TGGAGGAGGTGTCCAAGGAGAA	qRT-PCR
OsPT3-R (LOC_Os10g30770)	CAATGAGCTCTGTTGAACCACCGT	qRT-PCR
OsPT6-F (LOC_Os08g45000)	GCCCCTGCAAACTGTACTG	qRT-PCR
OsPT6-R (LOC_Os08g45000)	AGCCAGGCCAGTTATATATCAAC	qRT-PCR
OsPT8-F (LOC_Os10g30790)	TCCAGAAGGACATCTTCACCAGCA	qRT-PCR
OsPT8-R (LOC_Os10g30790)	ATGTCGATGAGGAAGACGGTGAAC	qRT-PCR
OsPT10-F (LOC_Os06g21950)	GTCTCCGTGTGAGTGAACTCGATCAT	qRT-PCR
OsPT10-R (LOC_Os06g21950)	CATGCACTCTCTCTGACGCACAAA	qRT-PCR
