# Supplementary material for: Five Post-Translational Modification Residues of CmPT2 Play Key Roles in Yeast and Rice
Source: MDPI journal article supplement (doi:10.3390/ijms24032025), 2023-01-19
Supplement: s1 [file s1 › Supplementary Table S2.xlsx]

## Sheet: Sheet1
Supplemental Table S2 Nutrient solution formulation of rice materials.
Component	Concentrate solution (1 L)	Working Solution (40 L)
NH4Cl	61.11 g	25 mL
Ca(NO3)2∙4H2O	134.9 g	25 mL
CaCl2	25.18 g	25 mL
NaH2PO4∙2H2O	40.3 g	Nomal Pi: 25 mL
		300 µM Pi: 23.4 mL
		10 µM Pi: 0.78 mL
		0 µM Pi: 0 mL
K2SO4	71.4 g	25 mL
MgSO4∙7H2O	32.4 g	25 mL
MnCl2	1.5 g	25 mL
(NH4)6MO7O24∙4H2O	0.074 g
H3BO3	0.934 g
ZnSO4∙7H2O	0.035g
CuSO4∙5H2O	0.031 g
FeCl3∙6H2O	7.7 g
Citric acid	11.9 g
