# Supplementary material for: Five Post-Translational Modification Residues of CmPT2 Play Key Roles in Yeast and Rice
Source: MDPI journal article supplement (doi:10.3390/ijms24032025), 2023-01-19
Supplement: s1 [file s1 › Supplementary Table S3.xlsx]

## Sheet: Sheet1
Supplemental Table S3 PCR analysis of T1 and T2 lines
A: T1 lines
Lines	Positive rate	Lines	Positive rate	Lines	Positive rate	Lines	Positive rate
OE-1	18/24	OE-21	17/24	G222A-1	16/24	Y242A-1	16/23
OE-2	17/24	OE-22	17/24	G222A-2	17/24	Y242A-2	20/24
OE-3	19/24	OE-23	14/17	G222A-3	18/24	Y242A-3	18/24
OE-4	13/23	OE-24	15/24	G222A-4	17/24	Y242A-4	20/24
OE-5	16/24	OE-25	20/24	G222A-5	14/24	Y242A-5	14/24
OE-6	18/24	OE-26	16/24	G222A-6	22/24	Y242A-6	23/23
OE-7	17/24	OE-27	19/24	G222A-7	-	Y242A-7	20/21
OE-8	10/20	OE-28	-	G222A-8	21/24	Y242A-8	15/23
OE-9	8/21	OE-29	18/19	G222A-9	15/24	Y242A-9	16/24
OE-10	15/23	OE-30	18/24	G222A-10	20/24	Y242A-10	20/24
OE-11	18/23	G84A-1	24/24	T239A-1	4/24	N422A-1	18/24
OE-12	16/24	G84A-2	21/24	T239A-2	18/24	N422A-2	18/24
OE-13	19/24	G84A-3	23/24	T239A-3	18/24	N422A-3	24/24
OE-14	20/24	G84A-4	18/24	T239A-4	16/24	N422A-4	17/24
OE-15	15/23	G84A-5	13/21	T239A-5	23/24	N422A-5	18/24
OE-16	16/23	G84A-6	23/24	T239A-6	20/24	N422A-6	16/24
OE-17	22/24	G84A-7	18/22	T239A-7	21/23	N422A-7	17/24
OE-18	18/24	G84A-8	16/24	T239A-8	18/24	N422A-8	19/24
OE-19	16/24	G84A-9	17/24	T239A-9	19/24	N422A-9	-
OE-20	17/23	G84A-10	18/21	T239A-10	24/24	N422A-10	17/24
B: T2 lines
Lines	Positive rate	Lines	Positive rate	Lines	Positive rate
OE-1-1	8/12	OE-10-1	10/12	T239A-3-1	8/11
OE-1-7	8/12	OE-10-5	8/9	T239A-3-3	10/11
OE-1-12	5/12	OE-10-10	6/10	T239A-3-6	5/11
OE-4-1	9/11	OE-11-1	9/9	Y242A-4-1	10/12
OE-4-2	3/9	OE-11-5	9/9	Y242A-4-2	10/10
OE-4-3	9/11	OE-11-11	12/12	Y242A-4-3	9/12
OE-8-1	5/5	G84A-10-3	12/12	N422A-7-1	10/11
OE-8-2	10/11	G84A-10-8	12/12	N422A-7-4	10/12
OE-8-4	12/12	G84A-10-13	12/12	N422A-7-5	9/10
OE-9-1	5/12	G222A-4-1	8/12
OE-9-2	7/12	G222A-4-2	6/11
-	-	G222A-4-5	10/10
